# Supplementary material for: Effects of 2-substitution on 14-epi-19-nortachysterol-mediated biological events: based on synthesis and X-ray co-crystallographic analysis with the human vitamin D receptor
Source: Royal Society of Chemistry journal article supplement (doi:10.1039/c8ob00158h), 2018-01-01

## Supplementary Information

### Effects of 2-substitution on 14-*epi*-19-nortachysterol-mediated biological events: Based on synthesis and X-ray co-crystallographic analysis with human vitamin D receptor

Daisuke Sawada,<sup>a,†</sup> Shinji Kakuda,<sup>b</sup> Akiko Takeuchi,<sup>b</sup> Fumihiro Kawagoe,<sup>a</sup>  
Midori Takimoto-Kamimura,<sup>b</sup> and Atsushi Kittaka<sup>a,\*</sup>

<sup>a</sup> *Faculty of Pharmaceutical Sciences, Teikyo University, Kaga, Itabashi, Tokyo*  
*173-8605, Japan*

<sup>b</sup> *Teijin Institute for Bio-medical Research, Teijin Pharma Ltd., Hino, Tokyo*  
*191-8512, Japan*

e-mail: akittaka@pharm.teikyo-u.ac.jp

|                                                                                                                                     |        |
|-------------------------------------------------------------------------------------------------------------------------------------|--------|
| General Remarks                                                                                                                     | S2     |
| <sup>1</sup> H and <sup>13</sup> C NMR Spectra for all new compounds <b>8-12</b><br>and the final compounds <b>6α</b> and <b>6β</b> | S3-S16 |

**General Remarks:**  $^1\text{H}$  and  $^{13}\text{C}$  NMR spectra were recorded on JEOL AL-400 NMR (400 MHz) and ECP-600 NMR (600 MHz) spectrometers.  $^1\text{H}$  NMR spectra were referenced with  $(\text{CH}_3)_4\text{Si}$  ( $\delta$  0.00 ppm) as an internal standard.  $^{13}\text{C}$  NMR spectra were referenced with deuterated solvent ( $\delta$  77.0 ppm for  $\text{CDCl}_3$  and 49.3 ppm for  $\text{CD}_3\text{OD}$ ). IR spectra were recorded on JASCO FT-IR-800 Fourier Transform Infrared Spectrophotometer. High resolution mass spectra were obtained on SHIMADZU LCMS-IT-TOF mass spectrometer in positive electrospray ionization (ESI) method. Optical rotations were measured on a JASCO DIP-370 digital polarimeter. Column chromatography was performed on silica gel 60N (Kanto Chemical Co., Inc., 100-210  $\mu\text{m}$ ) or silica gel 60 (Merck, 0.040-0.063 mm). Preparative thin layer chromatography was performed on silica gel 60  $\text{F}_{254}$  (Merck, 0.5 mm). High performance liquid chromatography (HPLC) was carried out on a SHIMADZU HPLC system consisting of the following equipments: pump, LC-6AD; detector, SPD-10A; column, YMC-Pack ODS-A. All experiments were performed under anhydrous conditions in an atmosphere of argon, unless otherwise mentioned.

single\_pulse

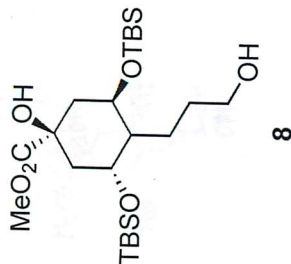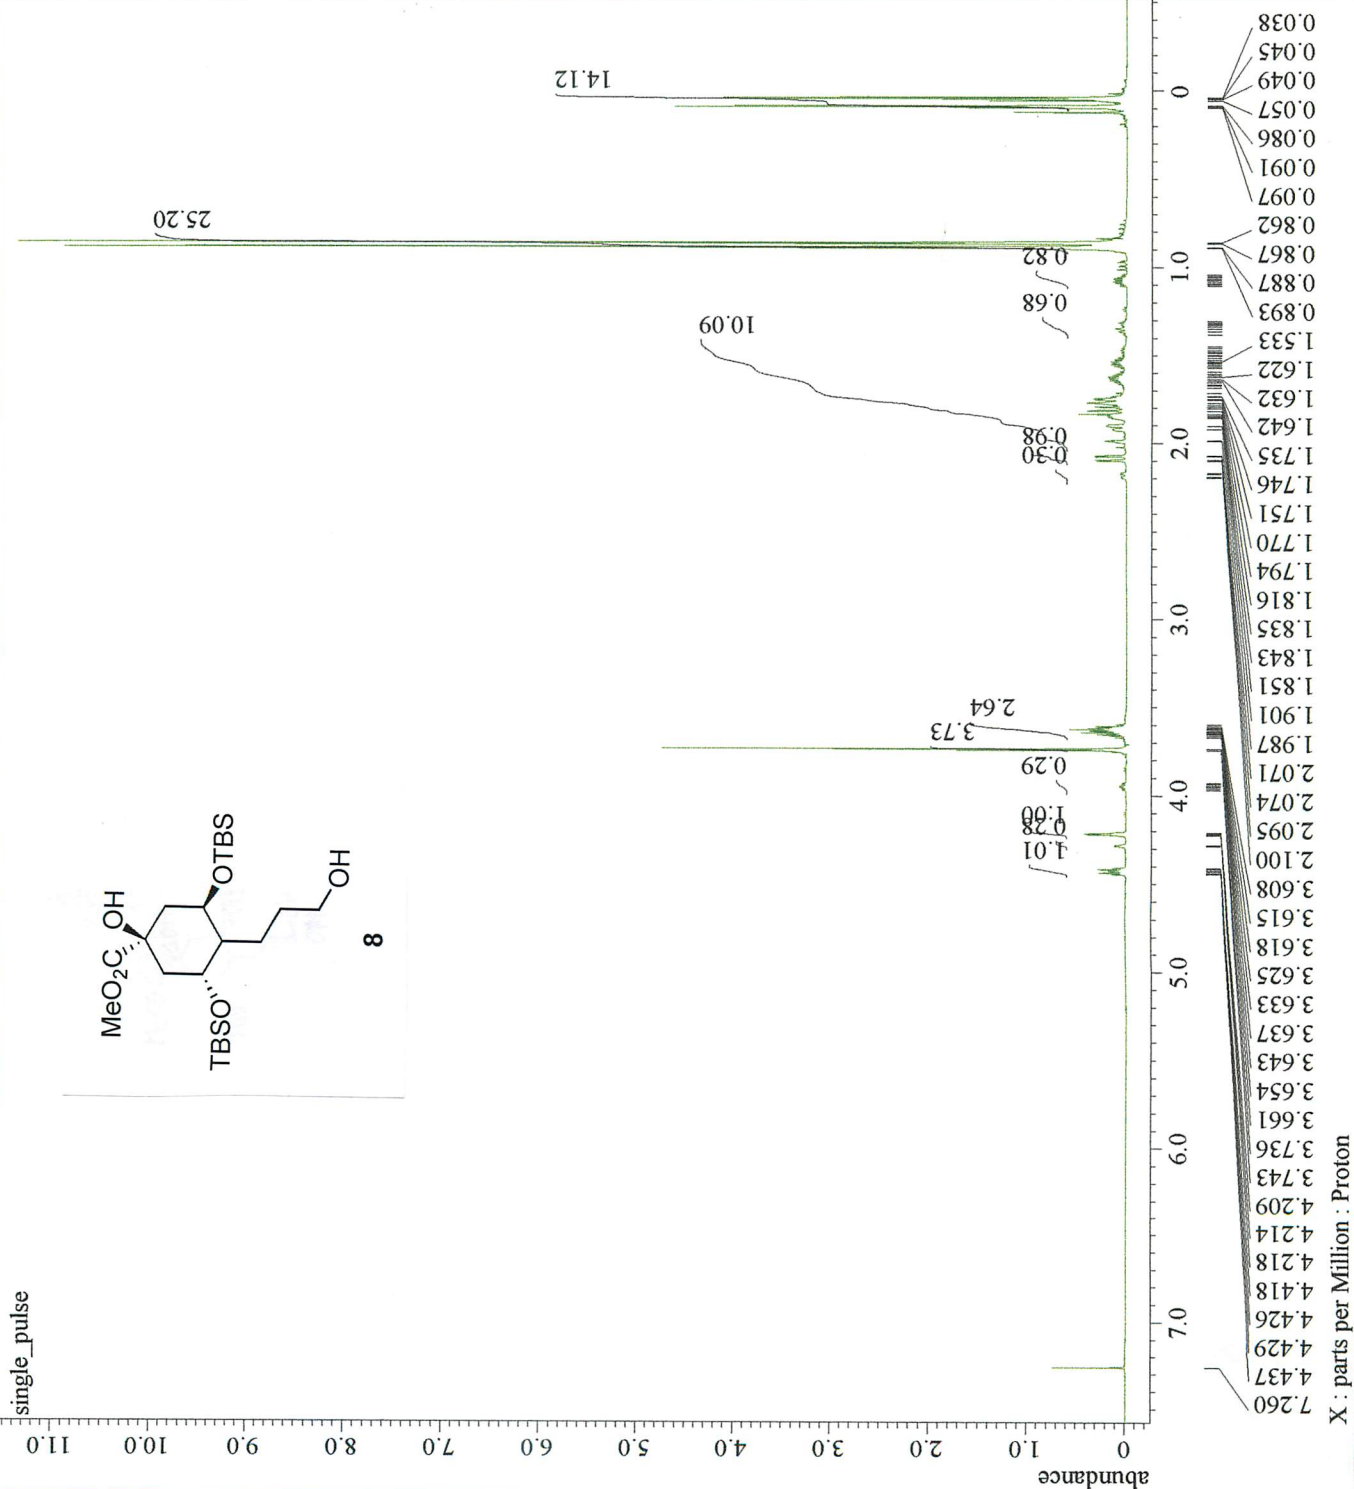

Filename = 41KWG180223-Aring-OH-data\_  
 Author = Y-yakka  
 Experiment = proton.jpg  
 Sample Id = 41KWG180223-Aring-OH-data  
 Solvent = CHLOROFORM-D  
 Creation\_Time = 23-FEB-2018 12:39:14  
 Revision\_Time = 23-FEB-2018 12:45:49  
 Current\_Time = 23-FEB-2018 12:46:15  
 Comment = single pulse  
 Data Format = 1D COMPLEX  
 Dim\_Size = 13107  
 Dim\_Title = Proton  
 Dim\_Units = [ppm]  
 Dimensions = X  
 Site = JNM-ECA600  
 Spectrometer = DELTA2\_NMR  
 Field Strength = 14.09636928[T] (600[MHz])  
 X\_Acq\_Duration = 1.4548992[s]  
 X\_Domain = 1H  
 X\_Freq = 600.1723046[MHz]  
 X\_Offset = 5[ppm]  
 X\_Points = 16384  
 X\_Prescans = 1  
 X\_Resolution = 0.68733284[Hz]  
 X\_Sweep = 11.26126126[kHz]  
 X\_Sweep\_Clip = 9.00900901[kHz]  
 Irr\_Domain = Proton  
 Irr\_Freq = 600.1723046[MHz]  
 Irr\_Offset = 5[ppm]  
 Tri\_Domain = Proton  
 Tri\_Freq = 600.1723046[MHz]  
 Tri\_Offset = 5[ppm]  
 Clipped = FALSE  
 Scans = 8  
 Total\_Scans = 8  
 Relaxation\_Delay = 5[s]  
 Recvr\_Gain = 22  
 Temp\_Get = 22.3[degC]  
 X\_90\_Width = 8.1[us]  
 X\_Acq\_Time = 1.4548992[s]  
 X\_Angle = 45[deg]  
 X\_Atn = 2.5[dB]  
 X\_Pulse = 4.05[us]  
 Irr\_Mode = Off  
 Tri\_Mode = Off  
 Dante\_Presat = FALSE  
 Initial\_Wait = 1[s]  
 Repetition\_Time = 6.4548992[s]

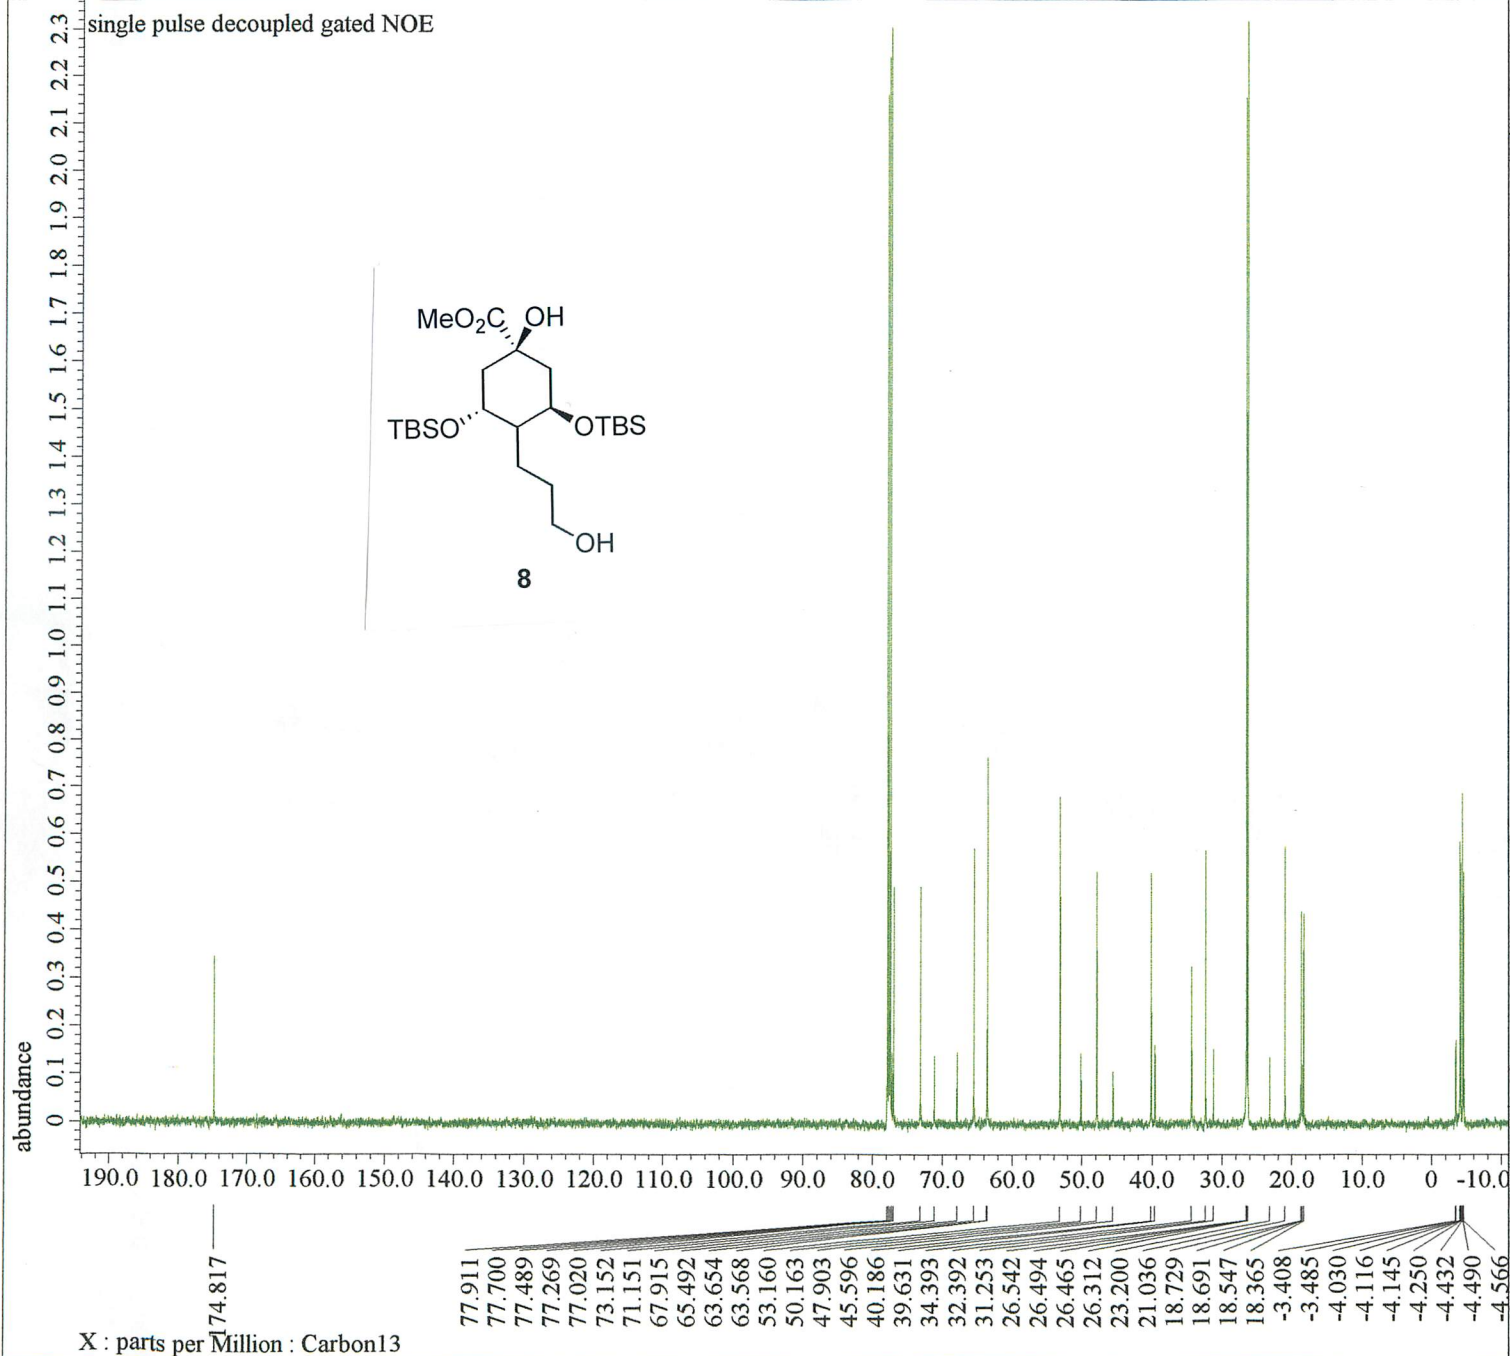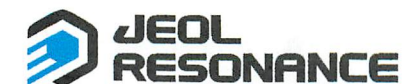

Filename = 41KWG180223-Aring-OH-data\_  
 Author = y-yakka  
 Experiment = carbon.jxp  
 Sample\_Id = 41KWG180223-Aring-OH-data  
 Solvent = CHLOROFORM-D  
 Creation\_Time = 23-FEB-2018 12:42:32  
 Revision\_Time = 23-FEB-2018 13:07:07  
 Current\_Time = 23-FEB-2018 13:07:19

Comment = single pulse decoupled gat  
 Data Format = 1D COMPLEX  
 Dim\_Size = 26214  
 Dim\_Title = Carbon13  
 Dim\_Units = [ppm]  
 Dimensions = X  
 Site = JNM-ECA600  
 Spectrometer = DELTA2\_NMR

Field Strength = 14.09636928[T] (600[MHz])  
 X\_Acq\_Duration = 0.69206016[s]  
 X\_Domain = 13C  
 X\_Freq = 150.91343039[MHz]  
 X\_Offset = 100[ppm]  
 X\_Points = 32768  
 X\_Prescans = 4  
 X\_Resolution = 1.44496109[Hz]  
 X\_Sweep = 47.34848485[kHz]  
 X\_Sweep\_Clippped = 37.87878788[kHz]  
 Irr\_Domain = Proton  
 Irr\_Freq = 600.1723046[MHz]  
 Irr\_Offset = 5[ppm]  
 Clipped = FALSE  
 Scans = 512  
 Total\_Scans = 512

Relaxation\_Delay = 2[s]  
 Recvr\_Gain = 60  
 Temp\_Get = 22.3[dC]  
 X\_90\_Width = 11.1[us]  
 X\_Acq\_Time = 0.69206016[s]  
 X\_Angle = 30[deg]  
 X\_Atn = 12[dB]  
 X\_Pulse = 3.7[us]  
 Irr\_Atn\_Dec = 21.947[dB]  
 Irr\_Atn\_Noie = 21.947[dB]  
 Irr\_Noise = WALTZ  
 Irr\_Pwidth = 76[us]  
 Decoupling = TRUE  
 Initial\_Wait = 1[s]  
 Noe = TRUE  
 Noe\_Time = 2[s]  
 Repetition\_Time = 2.69206016[s]

S4



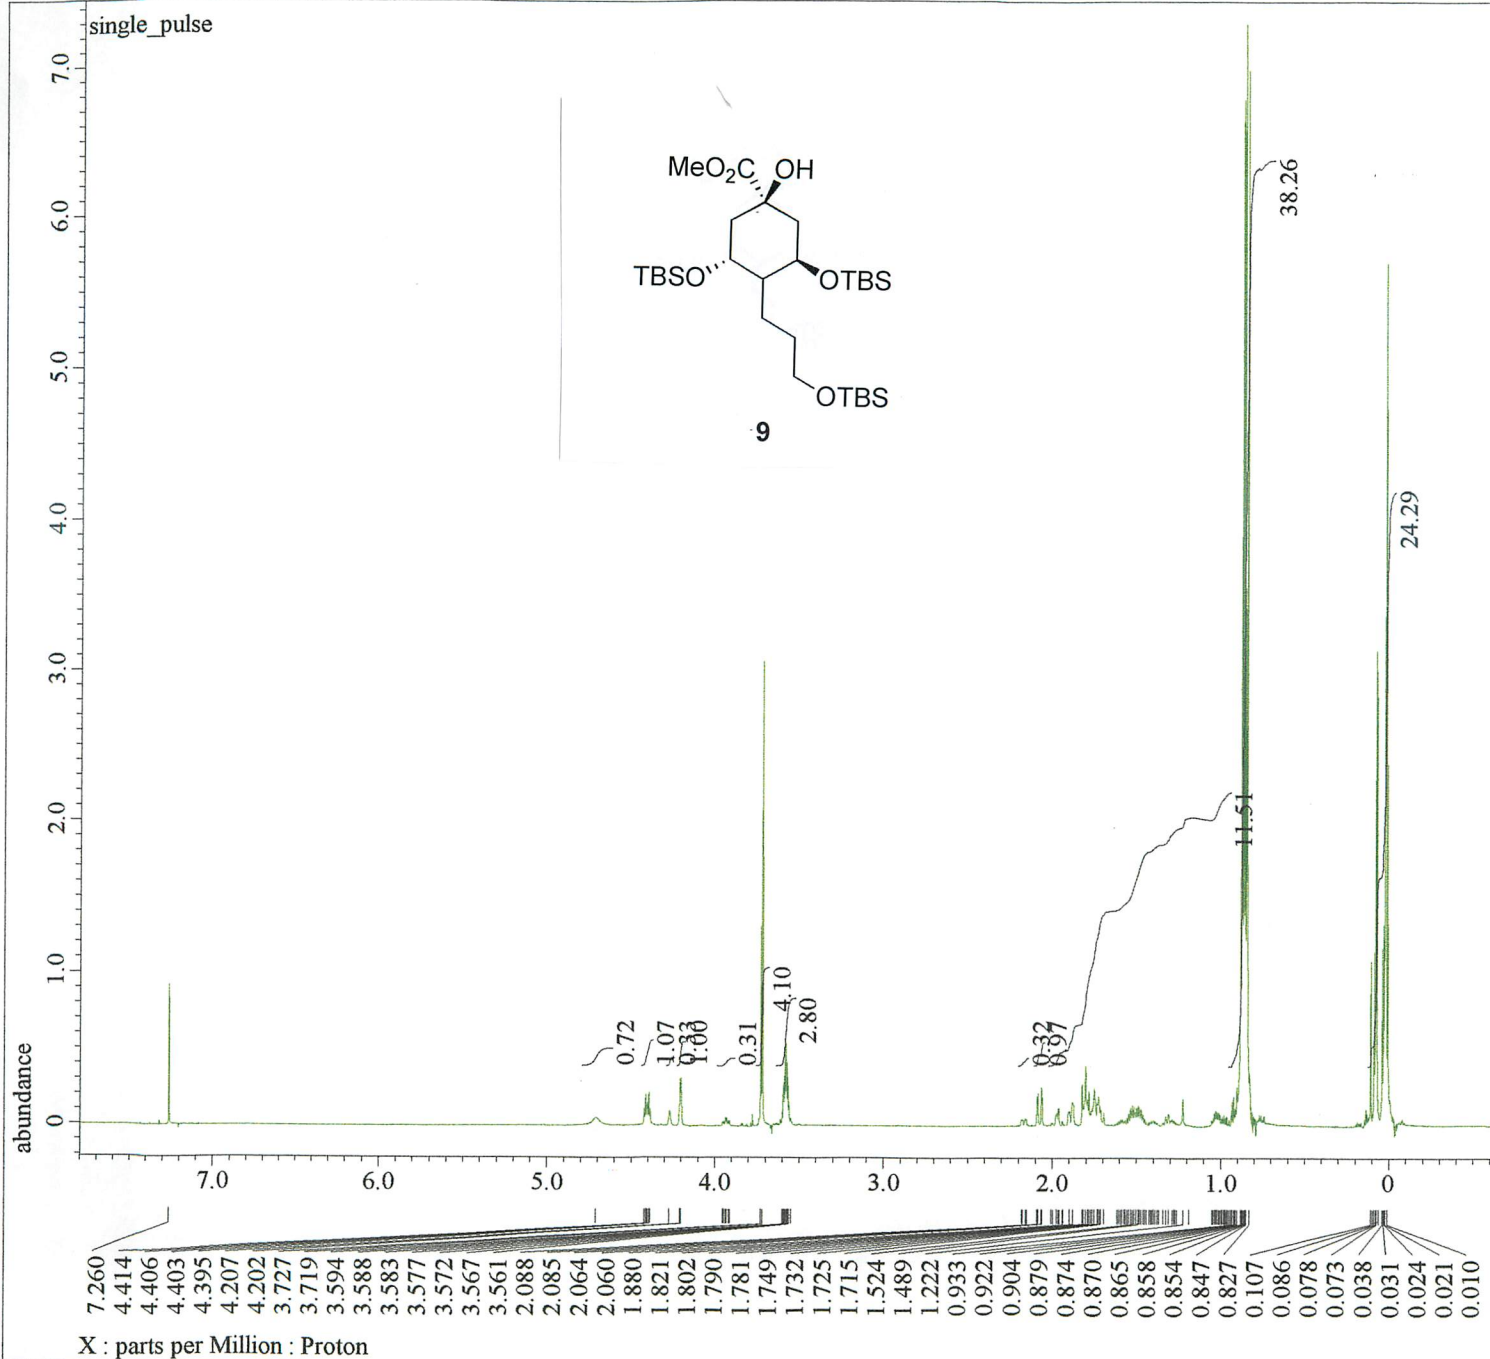

```

Filename      = 41KWG180223-aring-OTBS-dat
Author        = y-yakka
Experiment     = proton.jxp
Sample Id     = 41KWG180223-aring-OTBS-dat
Solvent       = CHLOROFORM-D
Creation Time  = 23-FEB-2018 18:02:18
Revision Time  = 23-FEB-2018 18:11:01
Current Time   = 23-FEB-2018 18:11:12

```

|              |                |
|--------------|----------------|
| Comment      | = single pulse |
| Data_Format  | = 1D COMPLEX   |
| Dim_Size     | = 13107        |
| Dim_Title    | = Proton       |
| Dim_Units    | = [ppm]        |
| Dimensions   | = X            |
| Site         | = JNM-ECA600   |
| Spectrometer | = DELTA2 NMR   |

```
Field_Strength = 14.09636928[T] (600[MHz])
X_Acq_Duration = 1.4548992[s]
X_Domain = 1H
X_Freq = 600.1723046[MHz]
X_Offset = 5[ppm]
X_Points = 16384
X_Prescans = 1
X_Resolution = 0.68733284[Hz]
X_Sweep = 11.26126126[kHz]
X_Sweep_Clippped = 9.00900901[kHz]
Irr_Domain = Proton
Irr_Freq = 600.1723046[MHz]
Irr_Offset = 5[ppm]
Tri_Domain = Proton
Tri_Freq = 600.1723046[MHz]
Tri_Offset = 5[ppm]
FLIPPED = FALSE
Scans = 8
Total Scans = 8
```

```
Relaxation_Delay = 5[s]
Recvr_Gain       = 14
Temp_Get         = 22.1[dC]
X_90_Width       = 8.1[us]
X_Acq_Time       = 1.4548992[s]
X_Angle          = 45[deg]
X_Atn            = 2.5[dB]
X_Pulse          = 4.05[us]
Ifr_Mode         = Off
Tri_Mode         = Off
Dante_Presat     = FALSE
Initial_Wait     = 1[s]
Repetition_Time  = 6.4548992[s]
```

S5

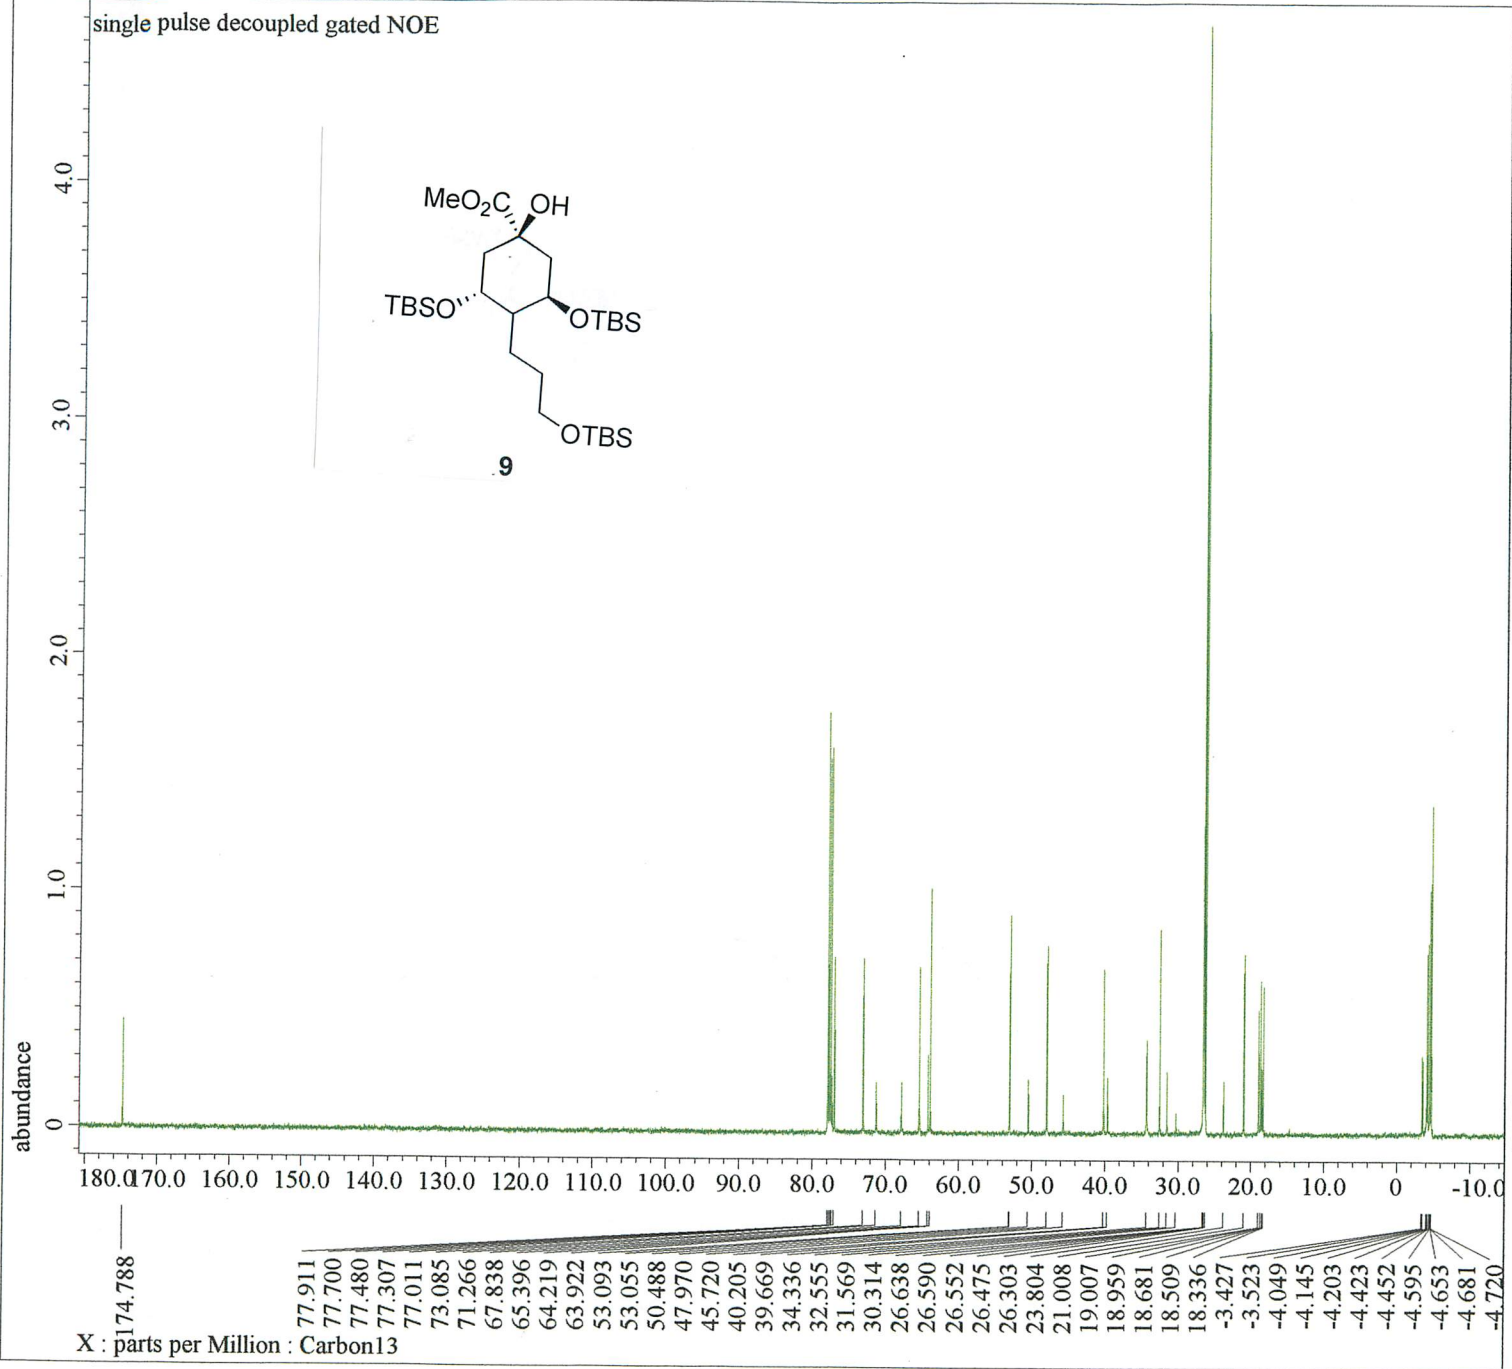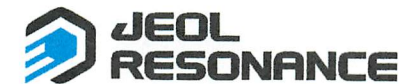

Filename = 41KWG180223-aring-OTBS-dat  
 Author = y-yakka  
 Experiment = carbon.jxp  
 Sample\_Id = 41KWG180223-aring-OTBS-dat  
 Solvent = CHLOROFORM-D  
 Creation\_Time = 23-FEB-2018 18:05:48  
 Revision\_Time = 23-FEB-2018 18:22:01  
 Current\_Time = 23-FEB-2018 18:23:46

Comment = single pulse decoupled gat  
 Data\_Format = 1D COMPLEX  
 Dim\_Size = 26214  
 Dim\_Title = Carbon13  
 Dim\_Units = [ppm]  
 Dimensions = X  
 Site = JNM-ECA600  
 Spectrometer = DELTA2\_NMR

Field\_Strength = 14.09636928[T] (600[MHz])  
 X\_Acq\_Duration = 0[s]  
 X\_Domain = 13C  
 X\_Freq = 150.91343039[MHz]  
 X\_Offset = 100[ppm]  
 X\_Points = 32768  
 X\_Prescans = 4  
 X\_Resolution = 1.44496109[Hz]  
 X\_Sweep = 47.34848485[kHz]  
 X\_Sweep\_Clippped = 37.87878788[kHz]  
 Irr\_Domain = Proton  
 Irr\_Freq = 600.1723046[MHz]  
 Irr\_Offset = 5[ppm]  
 Clipped = FALSE  
 Incomplete\_Copy = TRUE  
 Scans = 285  
 Total\_Scans = 285

Relaxation\_Delay = 2[s]  
 Recvr\_Gain = 58  
 Temp\_Get = 22.2[dC]  
 X\_90\_Width = 11.1[us]  
 X\_Acq\_Time = 0.69206016[s]  
 X\_Angle = 30[deg]  
 X\_Atn = 12[dB]  
 X\_Pulse = 3.7[us]  
 Irr\_Atn\_Dec = 21.947[dB]  
 Irr\_Atn\_Noe = 21.947[dB]  
 Irr\_Noise = WALTZ  
 Irr\_Pwidth = 76[us]  
 Decoupling = TRUE  
 Initial\_Wait = 1[s]  
 Noe = TRUE  
 Noe\_Time = 2[s]  
 Repetition\_Time = 2.69206016[s]

S6

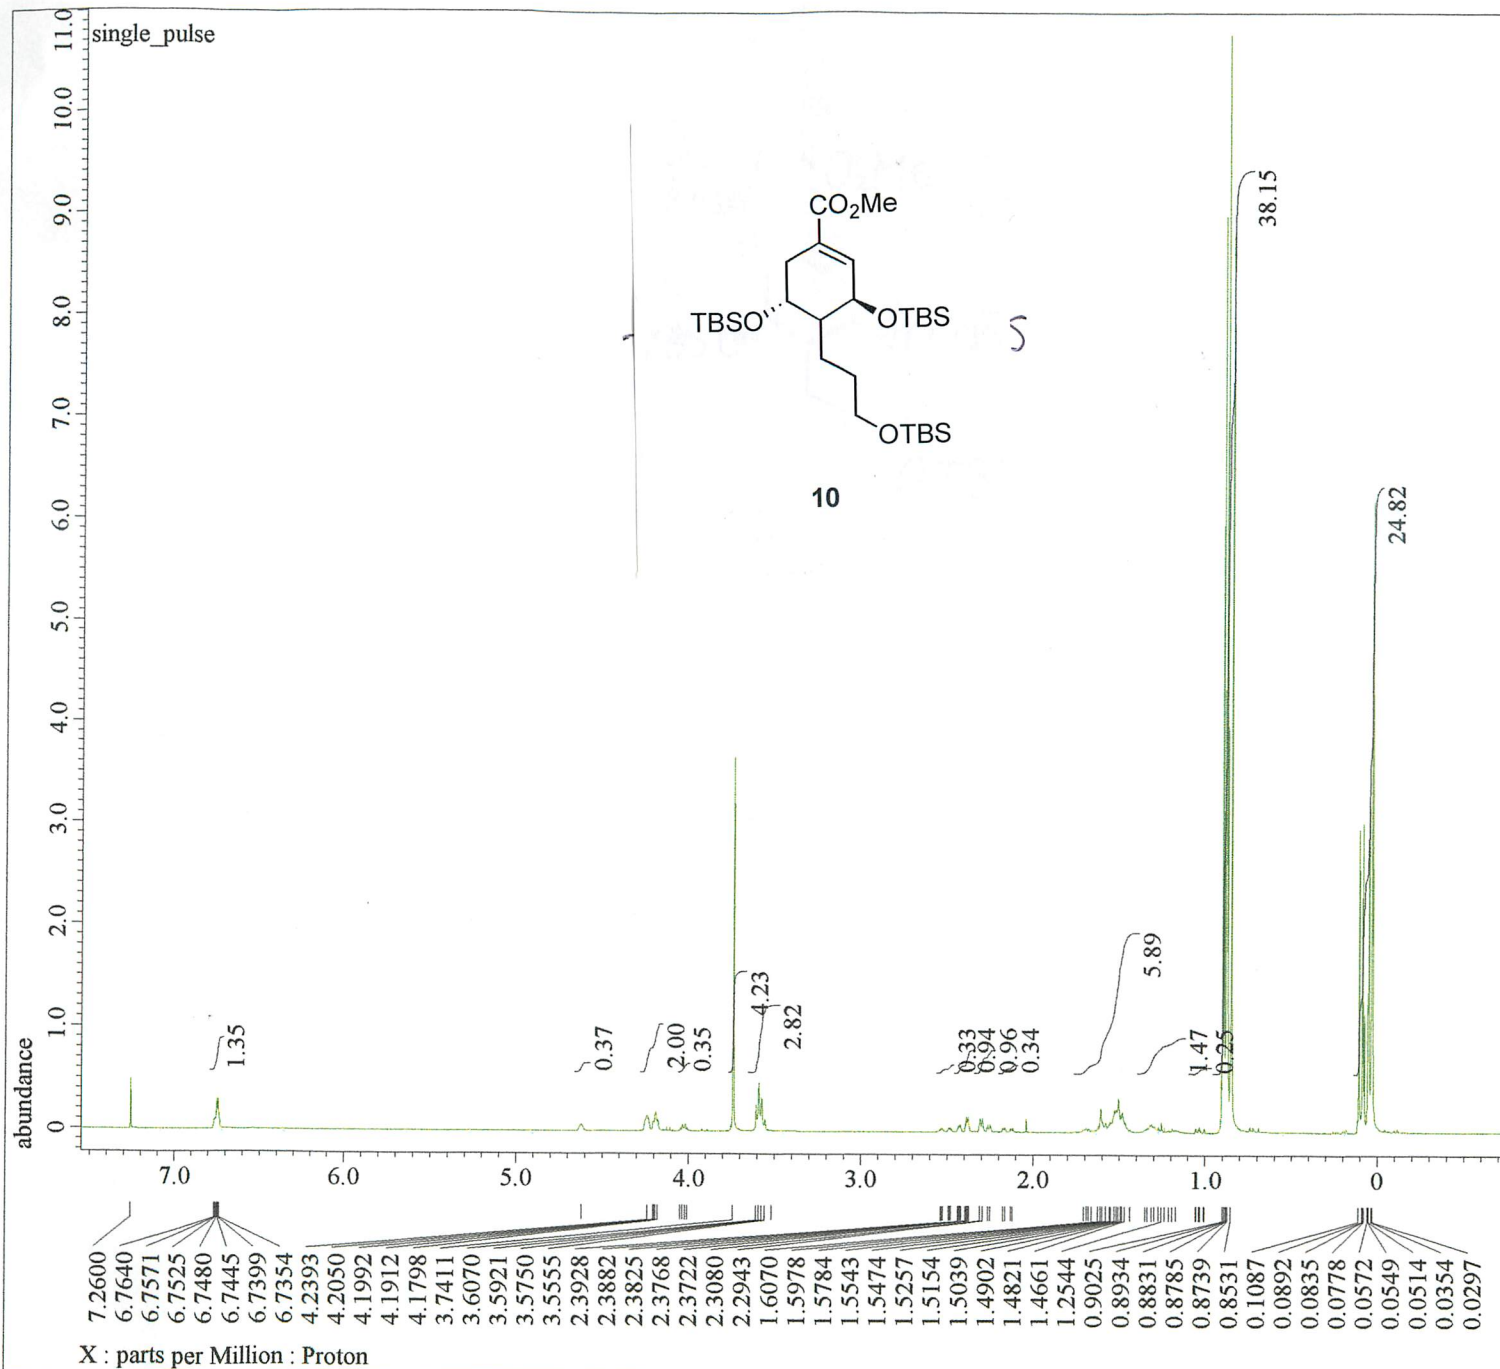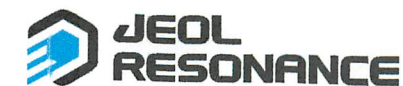

Filename = 41KWG180227-arang-3\_Proton  
 Author = y-yakka  
 Experiment = proton.jxp  
 Sample\_Id = 41KWG180227-arang-3  
 Solvent = CHLOROFORM-D  
 Creation\_Time = 27-FEB-2018 17:30:36  
 Revision\_Time = 27-FEB-2018 17:44:00  
 Current\_Time = 27-FEB-2018 17:46:58

Comment = single\_pulse  
 Data Format = 1D COMPLEX  
 Dim\_Size = 13107  
 Dim\_Title = Proton  
 Dim\_Units = [ppm]  
 Dimensions = X  
 Site = JNM-ECS400  
 Spectrometer = DELTA2\_NMR

Field Strength = 9.389766[T] (400[MHz])  
 X\_Acq\_Duration = 2.18365952[s]  
 X\_Domain = 1H  
 X\_Freq = 399.78219838[MHz]  
 X\_Offset = 5[ppm]  
 X\_Points = 16384  
 X\_Prescans = 1  
 X\_Resolution = 0.45794685[Hz]  
 X\_Sweep = 7.5030012[kHz]  
 X\_Sweep\_Clippped = 6.00240096[kHz]  
 IRR\_Domain = Proton  
 Irr\_Freq = 399.78219838[MHz]  
 Irr\_Offset = 5[ppm]  
 Tri\_Domain = Proton  
 Tri\_Freq = 399.78219838[MHz]  
 Tri\_Offset = 5[ppm]  
 Clipped = FALSE  
 Scans = 8  
 Total\_Scans = 8

Relaxation\_Delay = 5[s]  
 Recvr\_Gain = 22  
 Temp\_Get = 24[dC]  
 X\_90\_Width = 6.3[us]  
 X\_Acq\_Time = 2.18365952[s]  
 X\_Angle = 45[deg]  
 X\_Atn = 1.1[dB]  
 X\_Pulse = 3.15[us]  
 Irr\_Mode = Off  
 Tri\_Mode = Off  
 Dante\_Presat = FALSE  
 Initial\_Wait = 1[s]  
 Repetition\_Time = 7.18365952[s]

S7



Filename = 41KWG180227-aring-3\_Carbon  
 Author = y-yakka  
 Experiment = carbon.jxp  
 Sample\_Id = 41KWG180227-aring-3  
 Solvent = CHLOROFORM-D  
 Creation\_Time = 27-FEB-2018 17:34:40  
 Revision\_Time = 27-FEB-2018 17:48:58  
 Current\_Time = 27-FEB-2018 17:49:10

Comment = single pulse decoupled gat  
 Data Format = 1D COMPLEX  
 Dim\_Size = 26214  
 Dim Title = Carbon13  
 Dim Units = [ppm]  
 Dimensions = X  
 Site = JNM-ECS400  
 Spectrometer = DELTA2 NMR

Field Strength = 9.389766[T] (400[MHz])  
 X\_Acq\_Duration = 1.04333312[s]  
 X\_Domain = 13C  
 X\_Freq = 100.52530333[MHz]  
 X\_Offset = 100[ppm]  
 X\_Points = 32768  
 X\_Prescans = 4  
 X\_Resolution = 0.95846665[Hz]  
 X\_Sweep = 31.40703518[kHz]  
 X\_Sweep\_Clipped = 25.12562814[kHz]  
 Irr\_Domain = Proton  
 Irr\_Freq = 399.78219838[MHz]  
 Irr\_Offset = 5[ppm]  
 Clipped = FALSE  
 Scans = 256  
 Total\_Scans = 256

Relaxation\_Delay = 2[s]  
 Recvr Gain = 60  
 Temp\_Get = 23.5[dC]  
 X\_90\_Width = 10.9[us]  
 X\_Acq\_Time = 1.04333312[s]  
 X\_Angle = 30[deg]  
 X\_Atn = 3.8[dB]  
 X\_Pulse = 3.63333333[us]  
 Irr\_Atn\_Dec = 26.327[dB]  
 Irr\_Atn\_Noe = 26.327[dB]  
 Irr\_Noise = WALTZ  
 Irr\_Pwidth = 0.115[ms]  
 Decoupling = TRUE  
 Initial\_Wait = 1[s]  
 Noe = TRUE  
 Noe\_Time = 2[s]  
 Repetition\_Time = 3.04333312[s]

S8

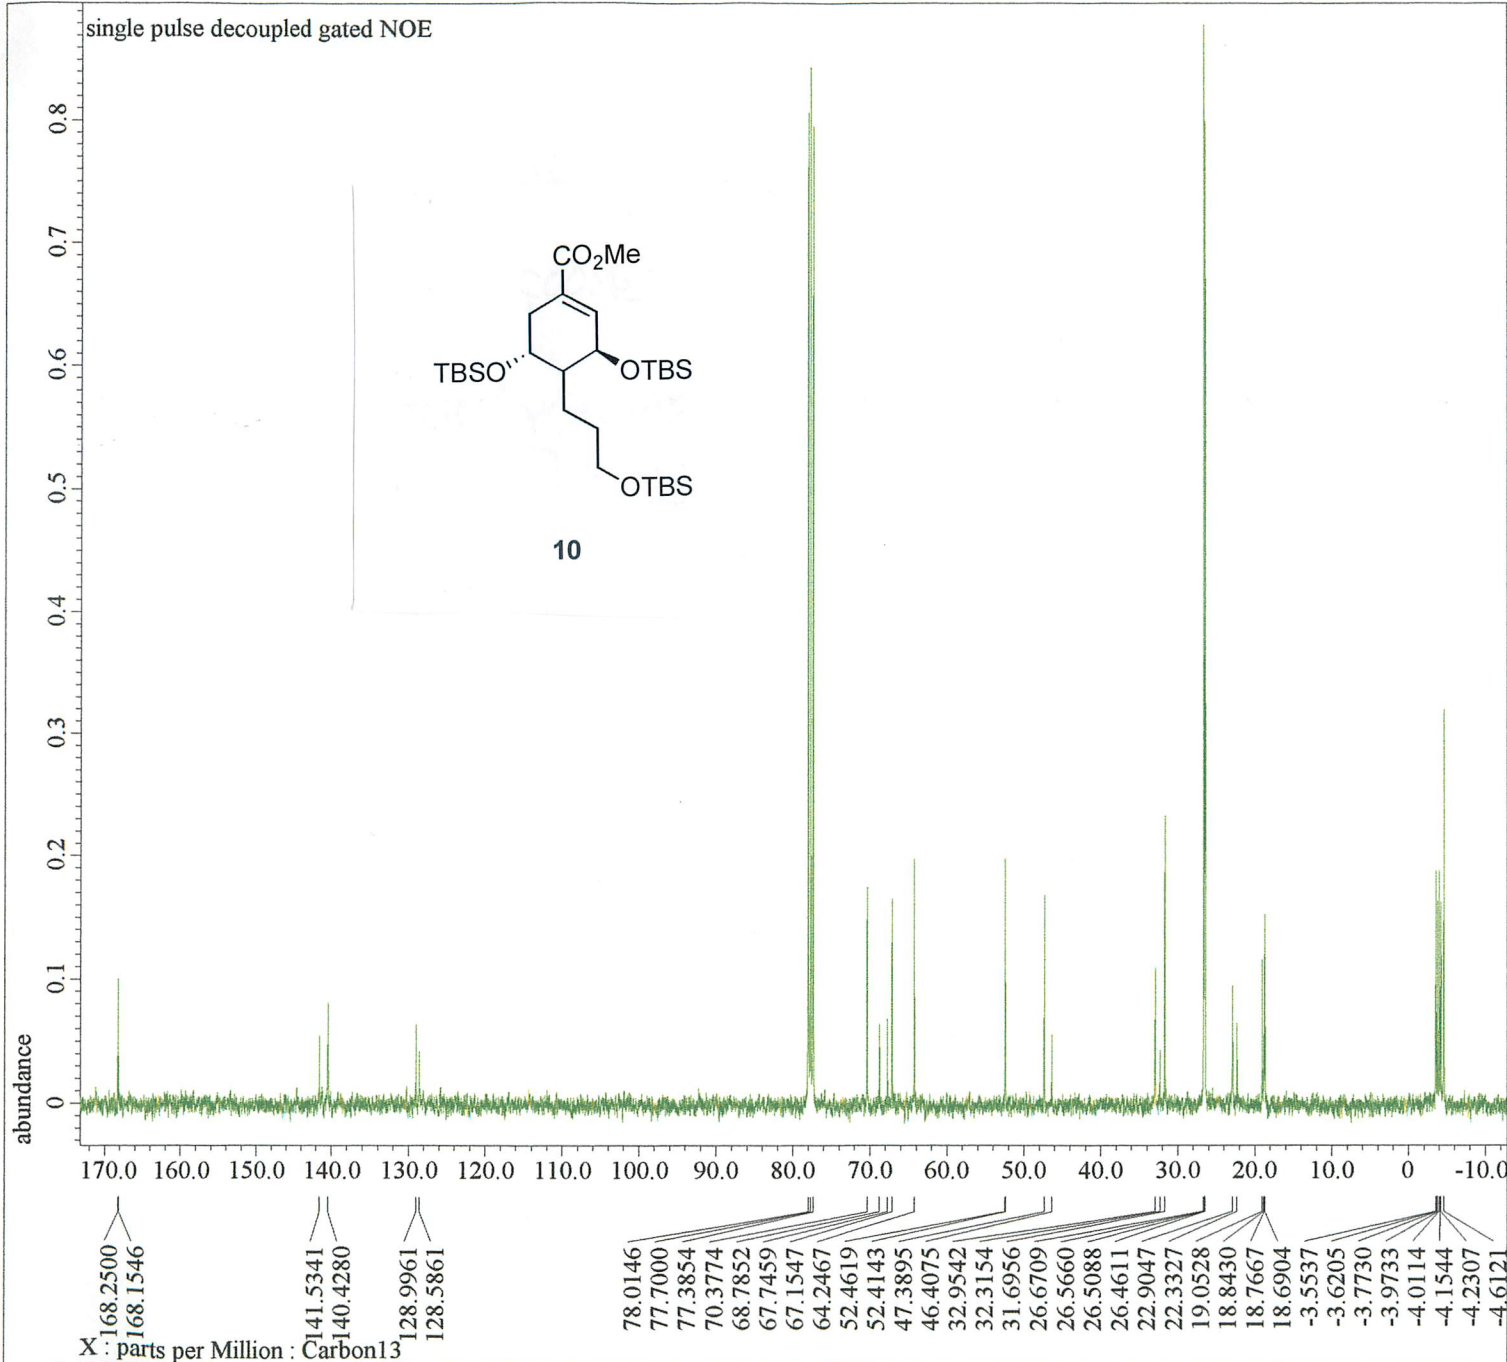











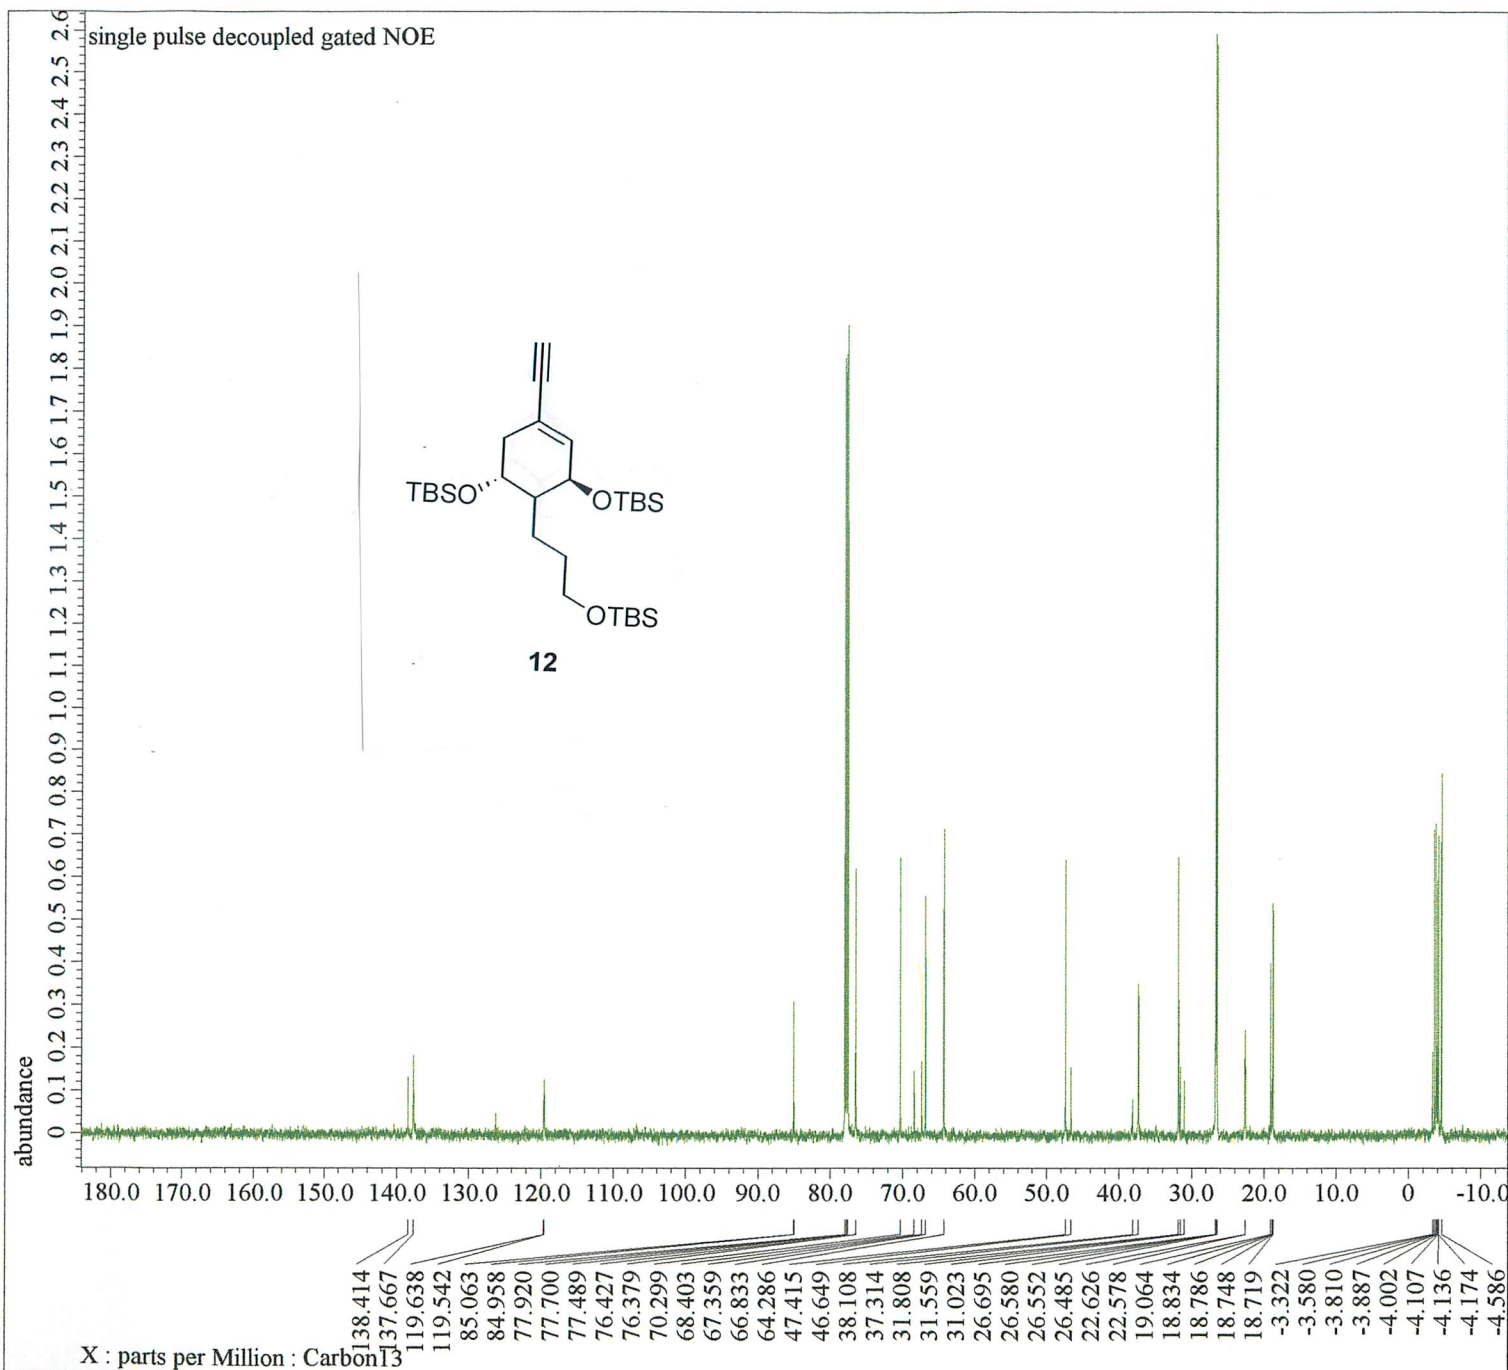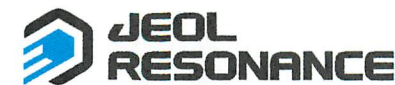

Filename = 41KWG180301-sawadaaring5\_C  
 Author = y-yakka  
 Experiment = carbon.jxp  
 Sample Id = 41KWG180301-sawadaaring5  
 Solvent = CHLOROFORM-D  
 Creation\_Time = 1-MAR-2018 14:12:23  
 Revision\_Time = 1-MAR-2018 14:32:58  
 Current\_Time = 1-MAR-2018 14:33:06

Comment = single pulse decoupled gat  
 Data\_Format = 1D COMPLEX  
 Dim\_Size = 26214  
 Dim\_Title = Carbon13  
 Dim\_Units = [ppm]  
 Dimensions = X  
 Site = JNM-ECA600  
 Spectrometer = DELTA2\_NMR

Field\_Strength = 14.09636928[T] (600[MHz])  
 X\_Acq\_Duration = 0[s]  
 X\_Domain = 13C  
 X\_Freq = 150.91343039 [MHz]  
 X\_Offset = 100 [ppm]  
 X\_Points = 32768  
 X\_Prescans = 4  
 X\_Resolution = 1.44496109 [Hz]  
 X\_Sweep = 47.34848485 [kHz]  
 X\_Sweep\_Clipped = 37.87878788 [kHz]  
 Irr\_Domain = Proton  
 Irr\_Freq = 600.1723046 [MHz]  
 Irr\_Offset = 5 [ppm]  
 Clipped = FALSE  
 Incomplete\_Copy = TRUE  
 Scans = 256  
 Total\_Scans = 256

Relaxation\_Delay = 2[s]  
 Recvr Gain = 60  
 Temp\_Get = 22.7 [dC]  
 X\_90\_Width = 11.1 [us]  
 X\_Acq\_Time = 0.69206016 [s]  
 X\_Angle = 30 [deg]  
 X\_Atn = 12 [dB]  
 X\_Pulse = 3.7 [us]  
 Irr\_Atn\_Dec = 21.947 [dB]  
 Irr\_Atn\_Noe = 21.947 [dB]  
 Irr\_Noise = WALTZ  
 Irr\_Pwidth = 76 [us]  
 Decoupling = TRUE  
 Initial\_Wait = 1[s]  
 Noe = TRUE  
 Noe\_Time = 2[s]  
 Repetition\_Time = 2.69206016 [s]

S12

\\10.20.10.246\moc600\41D3136-2-2.als  
41D3136-2-2

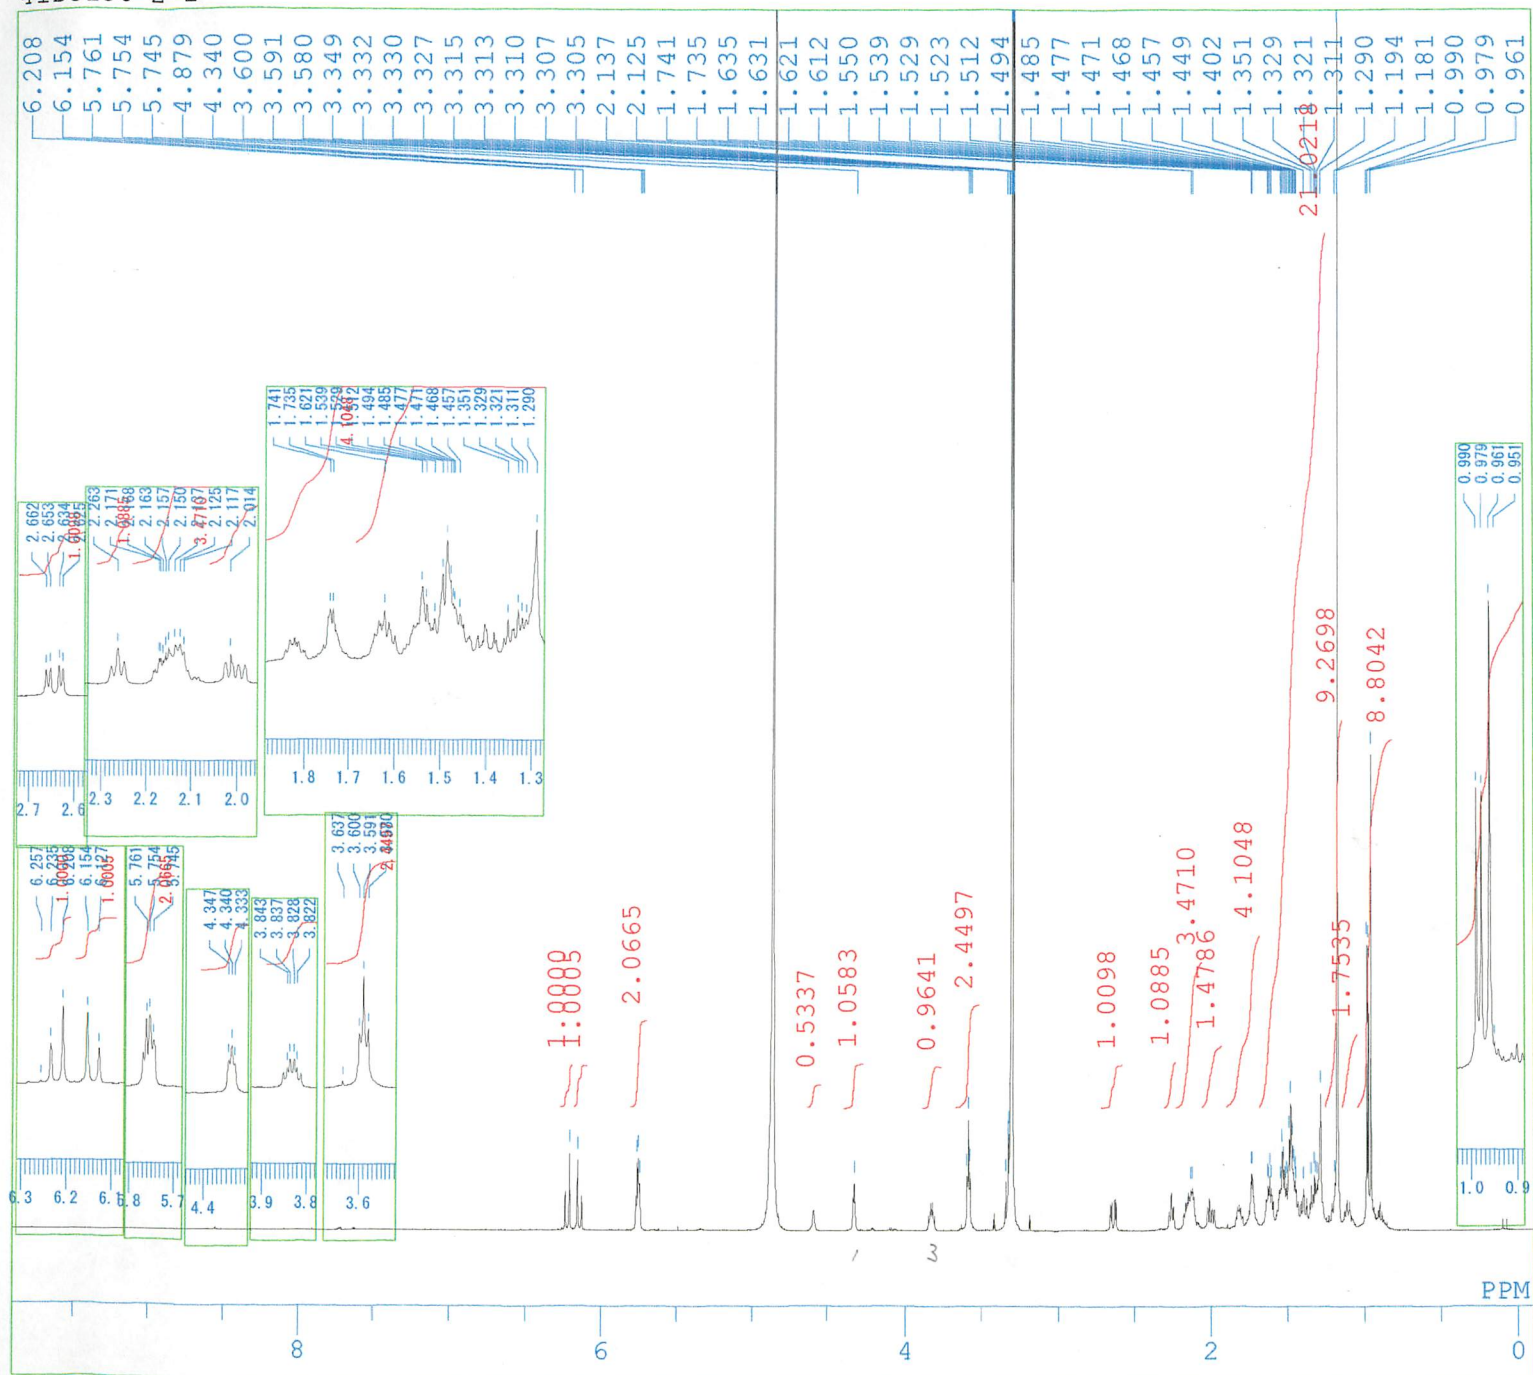

DFILE \\10.20.10.246\moc600\41D313  
COMNT 41D3136-2-2  
DATIM 3-JUN-2010 13:29:12  
OBNUC 1H  
EXMOD single\_pulse.exp  
OBFRQ 600.00 MHz  
OBSET 175.00 KHz  
OBFIN 305.5 Hz  
POINT 32768  
FREQU 9009.0 Hz  
SCANS 512  
ACQTM 3.637 sec  
PD 4.000 sec  
PW1 6.2 us  
IRNUC 1H  
CTEMP 22.1 c  
SLVNT CD3OD  
EXREF 3.31 ppm  
BF 0.12 Hz  
RGAIN 29

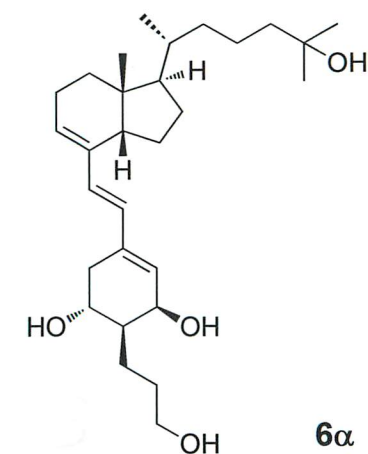

S13

\\10.20.10.246\moc600\41D3136-2-2\_C.als  
41D3136-2-2\_C

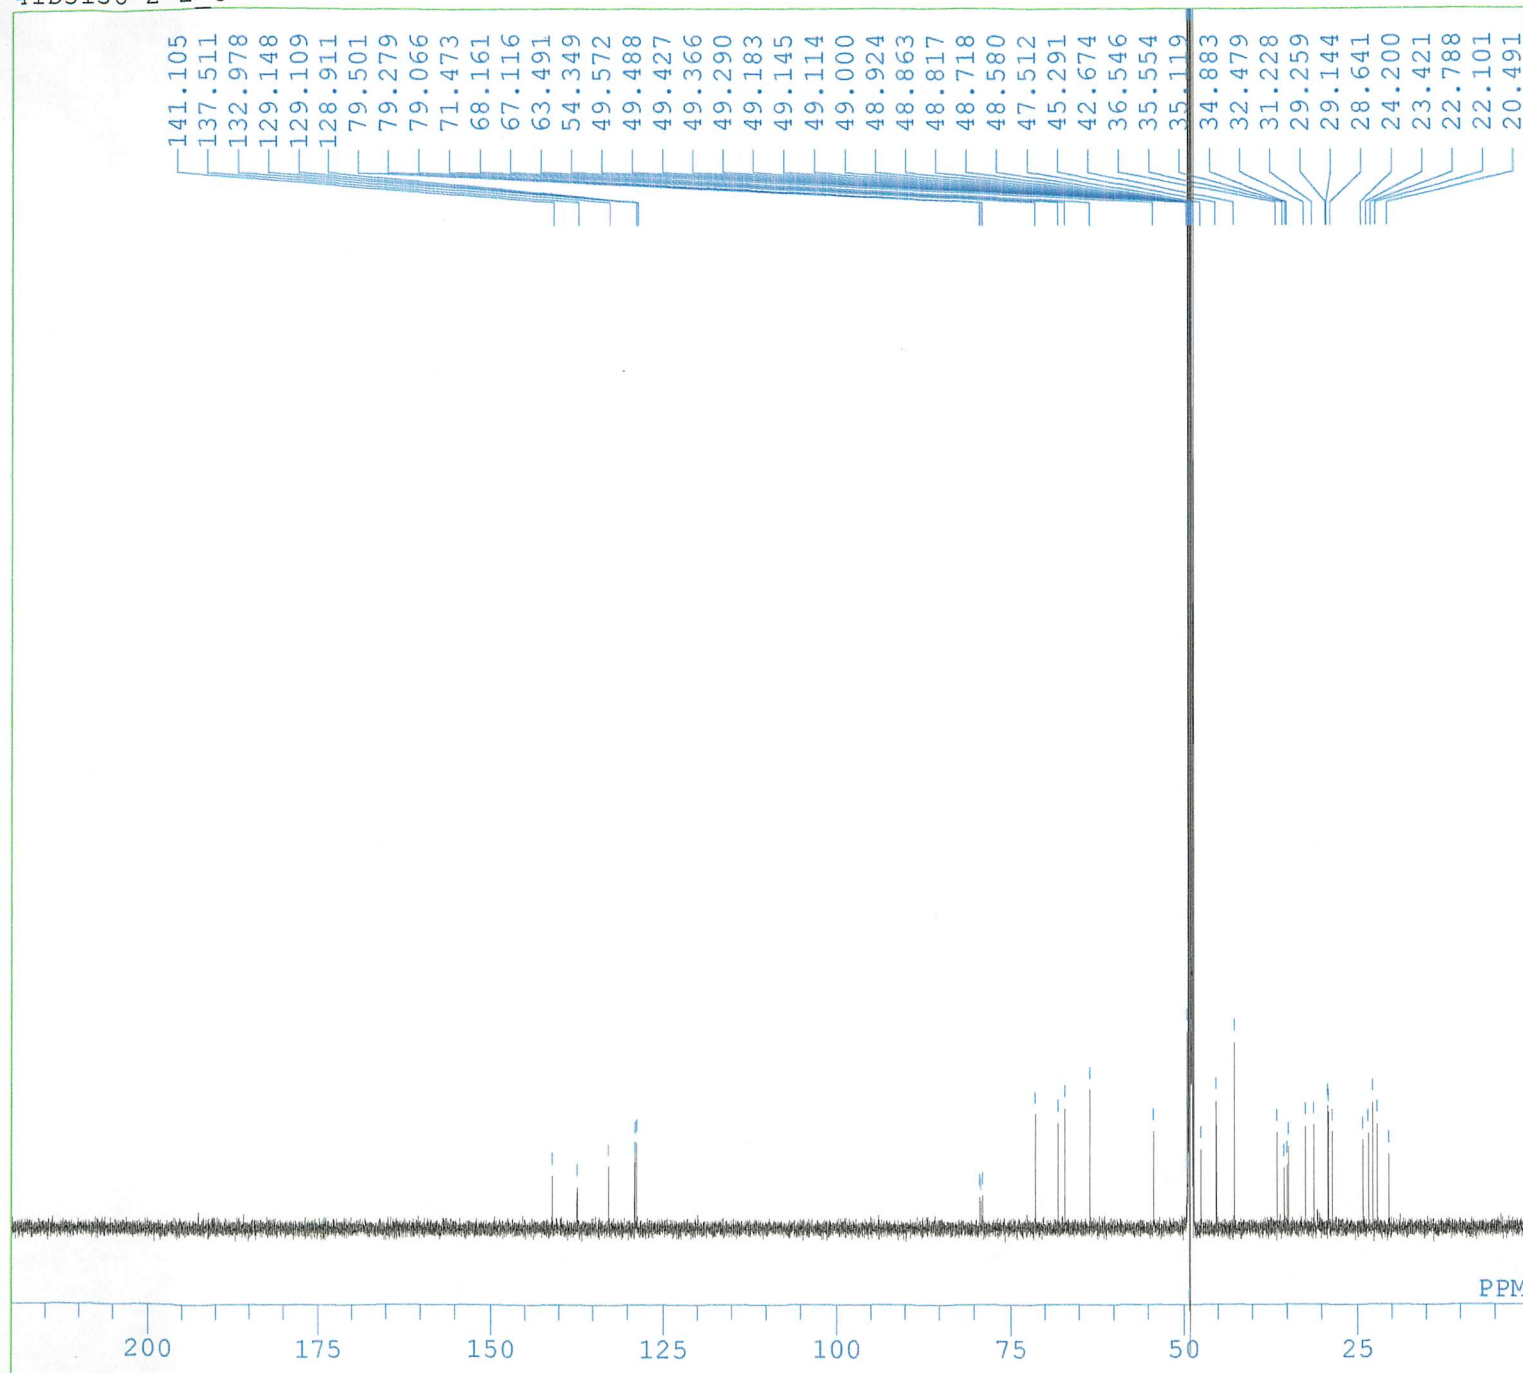

DFILE \\10.20.10.246\moc600\41D313  
COMNT 41D3136-2-2\_C  
DATIM 7-JUN-2010 10:50:42  
OBNUC 13C  
EXMOD single\_pulse\_dec  
OBFRQ 150.00 MHz  
OBSET 928.00 KHz  
OBFIN 521.7 Hz  
POINT 32768  
FREQU 37735.8 Hz  
SCANS 59000  
ACQTM 0.868 sec  
PD 3.000 sec  
PW1 3.7 us  
IRNUC 1H  
CTEMP 24.5 c  
SLVNT CD3OD  
EXREF 49.00 ppm  
BF 0.12 Hz  
RGAIN 30

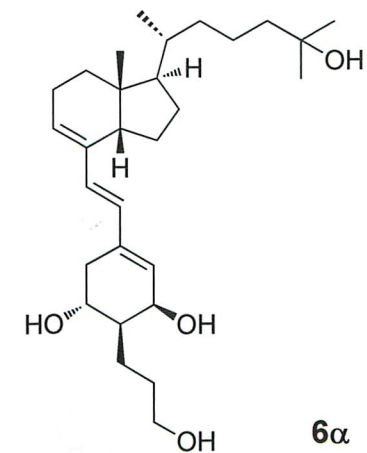

S14



\\10.20.10.243\40041\sawada\3\41d3136-2-1.als

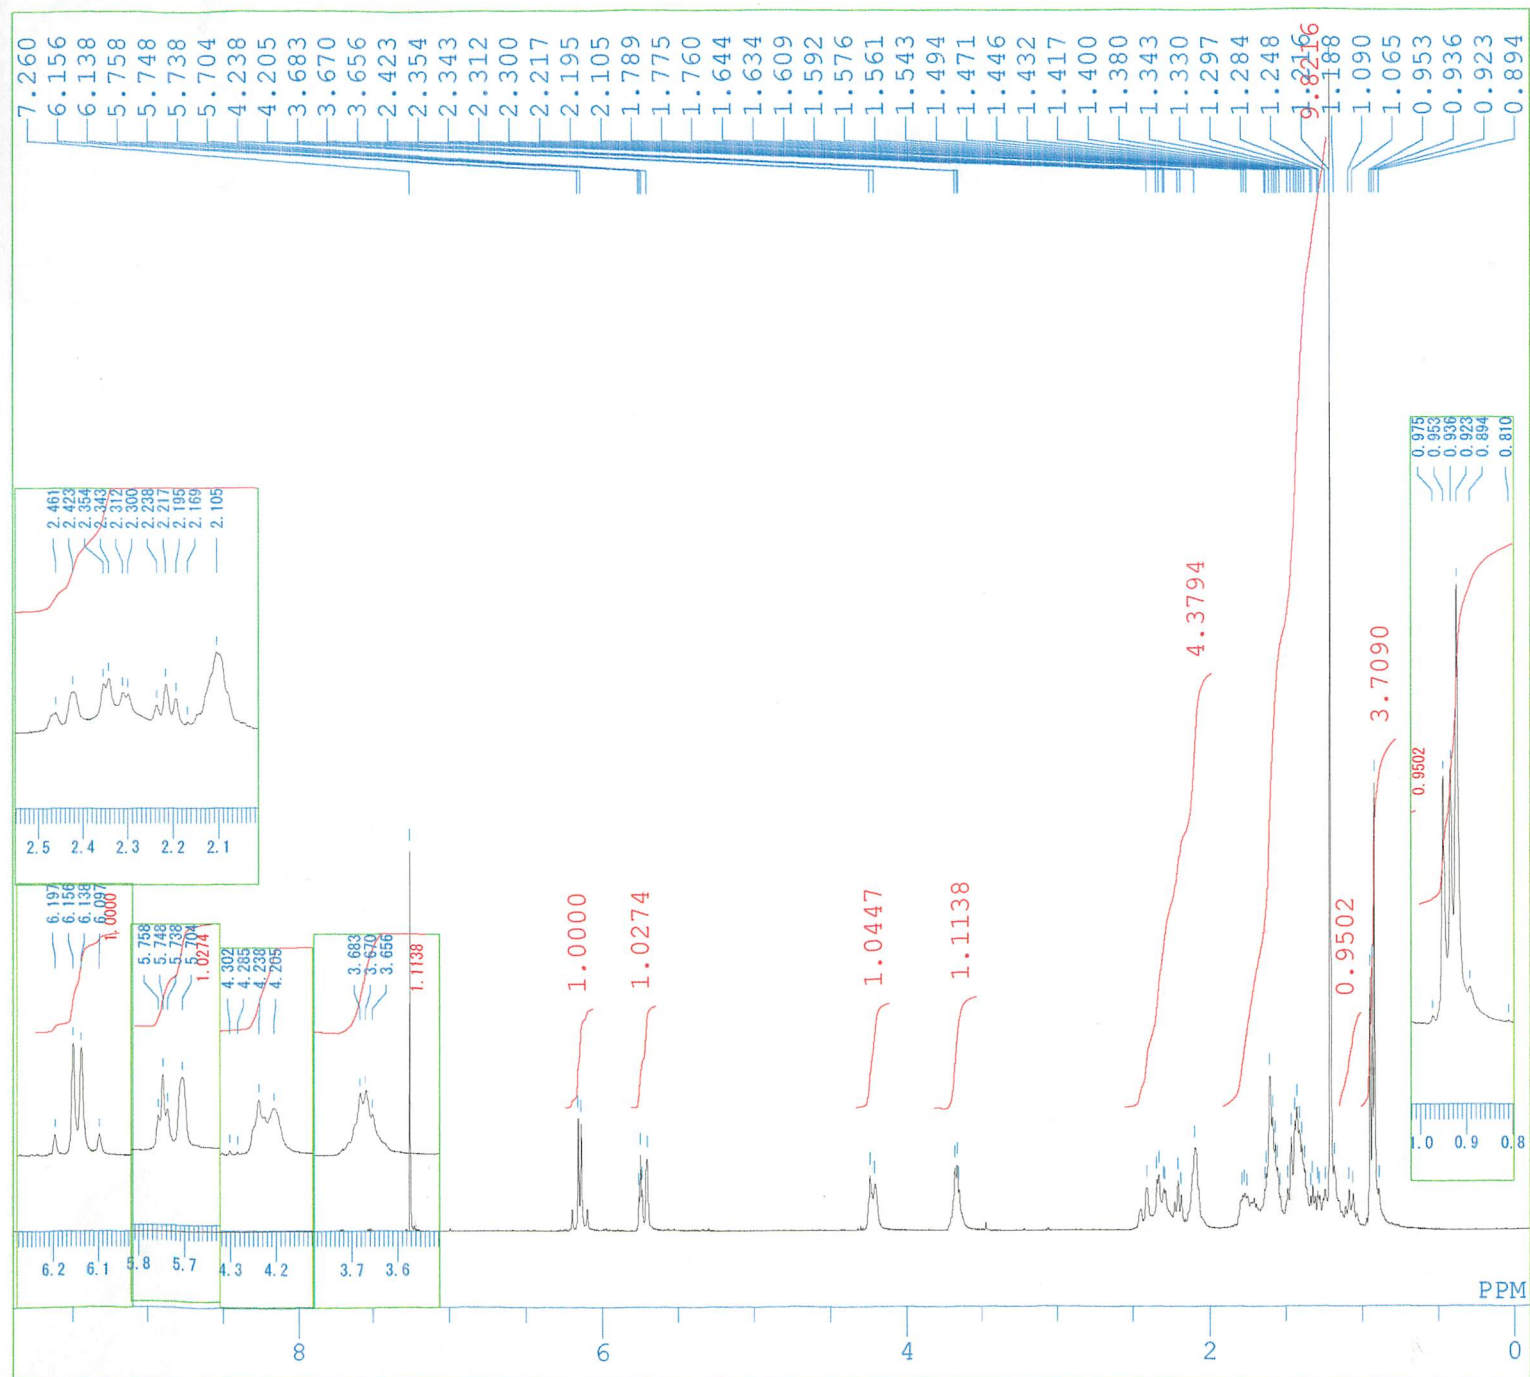

DFILE \\10.20.10.243\40041\sawada\  
 COMNT  
 DATIM Mon May 17 19:31:17 2010  
 OBNUC 1H  
 EXMOD NON  
 OBFRQ 399.65 MHz  
 OBSET 124.00 KHz  
 OBFIN 10500.0 Hz  
 POINT 32768  
 FREQU 8000.0 Hz  
 SCANS 16  
 ACQTM 4.096 sec  
 PD 2.904 sec  
 PW1 6.2 us  
 IRNUC 1H  
 CTEMP 23.2 c  
 SLVNT CDCL3  
 EXREF 7.26 ppm  
 BF 0.12 Hz  
 RGAIN 16

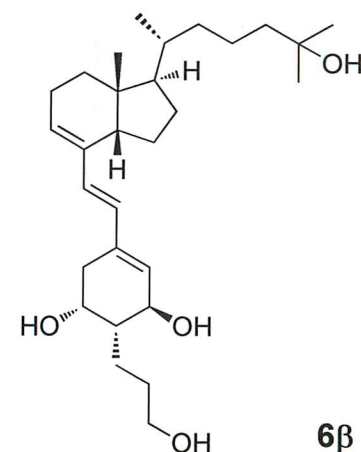

6β

S15

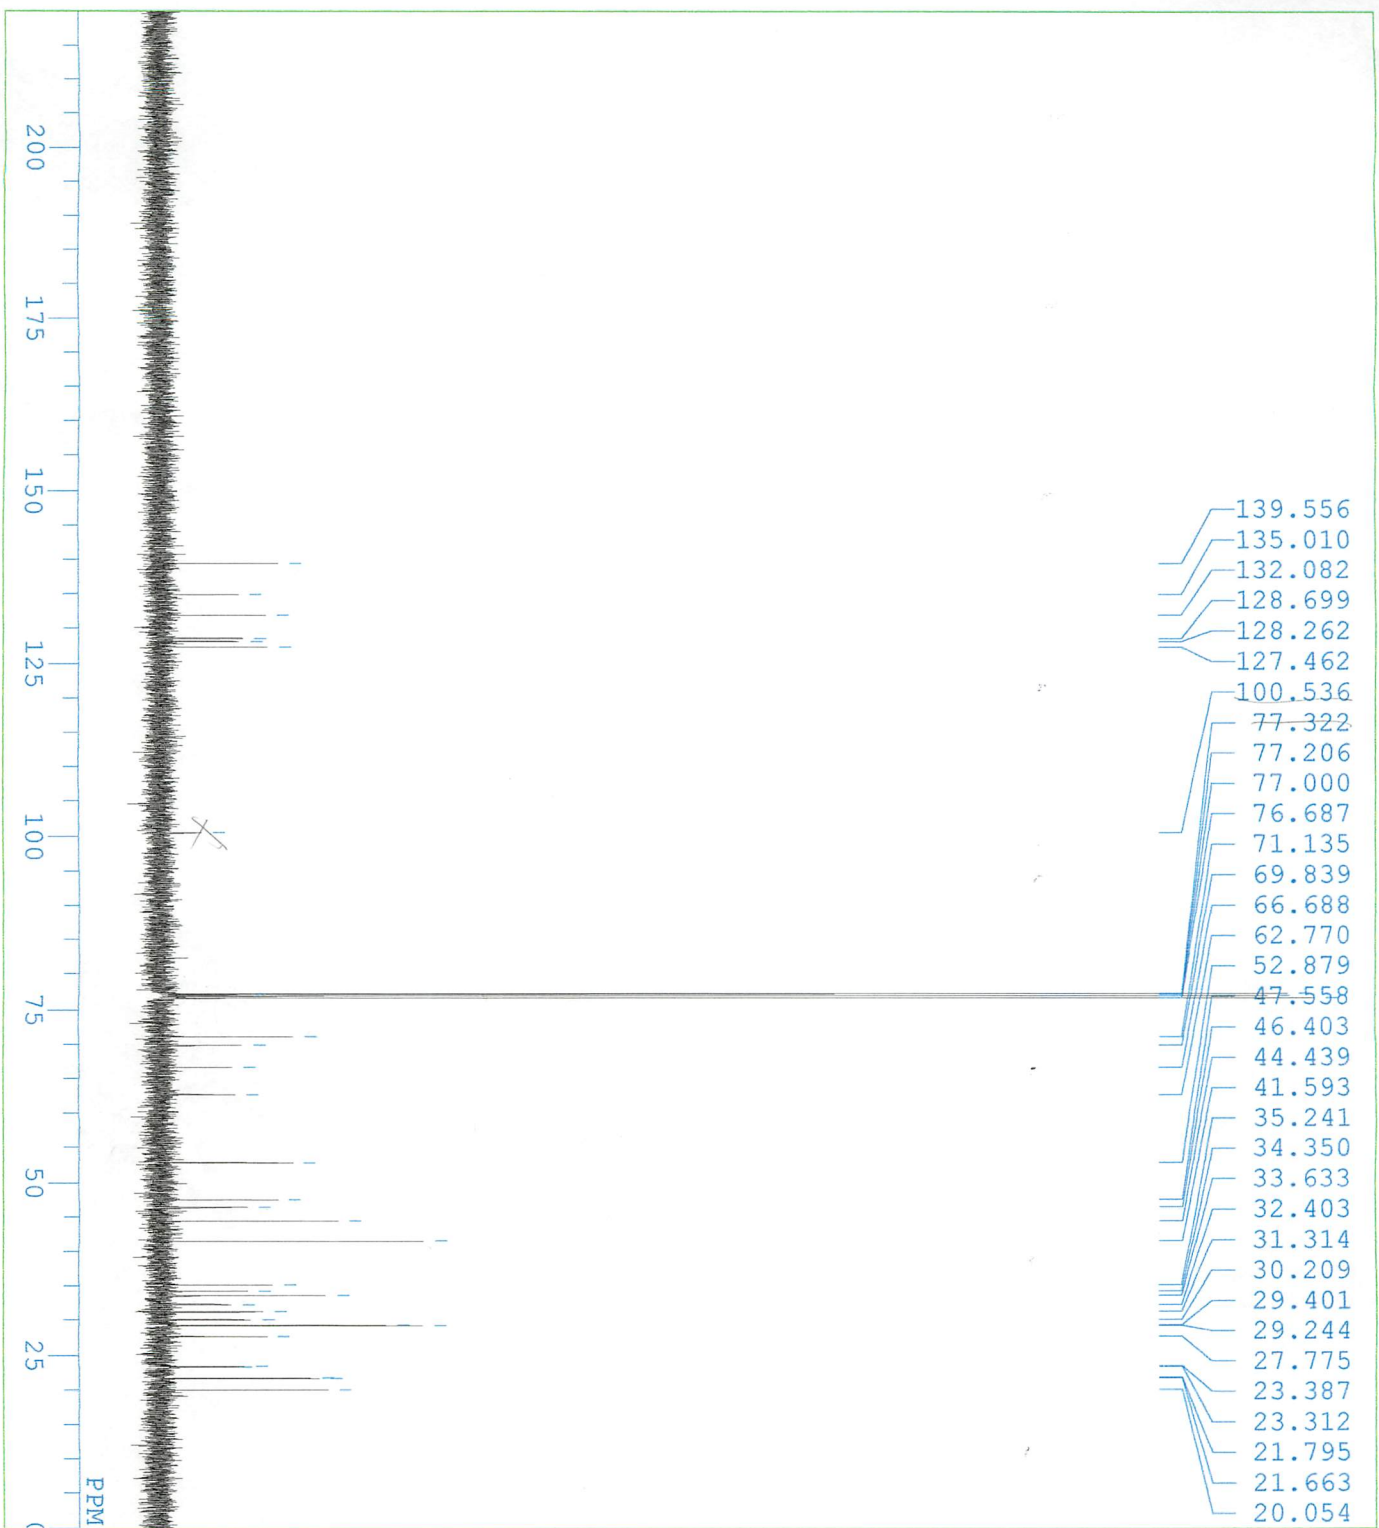

DFILE \\10.20.10.243\40041\sawada\  
 COMNT  
 DATIM Mon May 17 20:50:44 2010  
 OBNUC 13C  
 EXMOD BCM  
 OBFRQ 100.40 MHz  
 OBSET 125.00 KHz  
 OBFIN 10500.0 Hz  
 POINT 32768  
 FREQU 27173.9 Hz  
 SCANS 1200  
 ACQTM 1.206 sec  
 PD 1.794 sec  
 PW1 4.6 us  
 IRNUC 1H  
 CTEMP 23.4 C  
 SLVNT CDCL3  
 EXREF 77.00 ppm  
 BF 0.12 Hz  
 RGAIN 25

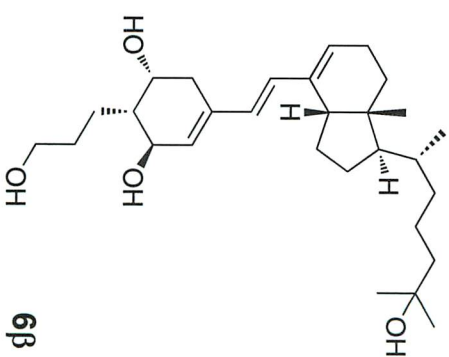

Supplement: c8ob00158h1.pdf [file c8ob00158h1.pdf]
